# Supplementary material
Source: publisher figshare collection journal article supplement (https://aacr.figshare.com/articles/dataset/_/22734073)
Supplement: Supplementary file 1 [file 40392964]

| Clinicaltrials.gov identifier | Sponsor                             | Study Title                                                                                                                                                                                                                    | Site                                                                                          | Phase | Histology                                                                                                                                   | Lympho depletion | IL-2                 | Treatment                                                                                              | Estimated enrollment (n) | Primary Endpoint                                                                                                                                                                                                                                                              |
|-------------------------------|-------------------------------------|--------------------------------------------------------------------------------------------------------------------------------------------------------------------------------------------------------------------------------|-----------------------------------------------------------------------------------------------|-------|---------------------------------------------------------------------------------------------------------------------------------------------|------------------|----------------------|--------------------------------------------------------------------------------------------------------|--------------------------|-------------------------------------------------------------------------------------------------------------------------------------------------------------------------------------------------------------------------------------------------------------------------------|
| NCT05238818                   | XinWu                               | Single Arm Phase I Trial of Autologous Tumor Infiltrating Lymphocyte Injection (GT202) in the Treatment of Metastatic or Recurrent Gynecological Tumors                                                                        | The Obstetrics and Gynecology Hospital of Fudan University, Shanghai, Shanghai, China, 200000 | I     | Metastatic or Recurrent Gynecological Tumors (limited to cervical cancer, ovarian cancer and endometrial cancer)                            | Yes              | Yes, regimen unknown | Tumor Infiltrating Lymphocytes manufactured to express mbIL-12 (GT202)                                 | 36                       | Overall Response Rate<br>Duration of Response<br>Progression-free Survival<br>Overall Survival<br>Disease Control Rate                                                                                                                                                        |
| NCT03801083                   | Udai Kammula                        | Adoptive Transfer of Tumor Infiltrating Lymphocytes for Biliary Tract Cancers                                                                                                                                                  | Allyson Welsch, Pittsburgh, Pennsylvania, United States, 15232                                | II    | Metastatic biliary tract carcinoma (including intrahepatic or extrahepatic cholangiocarcinoma, gallbladder cancer, or ampullary carcinoma). | Yes              | HD                   | Autologous Tumor-Infiltrating Lymphocytes (TIL)                                                        | 59                       | Objective Response Rate<br>Complete Response Rate<br>Duration of Response<br>Disease control rate<br>Progression-free Survival<br>Overall Survival<br>EORTC Quality of Life Questionnaire-Core 30 (QLQ-C30)<br>EuroQol 5 dimensions 5 levels (EQ-5D-5L)                       |
| NCT05141474                   | Vall d'Hebron Institute of Oncology | Assessment of the Safety and Tolerability of ex vivo Next-generation Neoantigen-selected Tumor-infiltrating Lymphocyte (TIL) Therapy in Advanced Epithelial Tumors and Immune Checkpoint Blockade (ICB) Resistant Solid Tumors | Vall d'Hebron Institute of Oncology, Barcelona, Spain                                         | I     | All solid tumors                                                                                                                            | Yes              | HD                   | NEXT-GEN-TIL (TILs that are selected based on their ability to recognize patient-specific neoantigens) | 10                       | Incidence of AE<br>Incidence of SAE<br>Treatment-limiting toxicity<br>Incidence of alternations in clinical laboratory test results<br>Incidence of alterations in vital signs measurement<br>Incidence of physical examination findings<br>Assessment of performance status. |

|             |                               |                                                                                                                            |                                                                                                       |    |                                                                                                                                                                                                         |     |                      |                                                                                                                                                                                                                 |                            |                                                                                                                                            |
|-------------|-------------------------------|----------------------------------------------------------------------------------------------------------------------------|-------------------------------------------------------------------------------------------------------|----|---------------------------------------------------------------------------------------------------------------------------------------------------------------------------------------------------------|-----|----------------------|-----------------------------------------------------------------------------------------------------------------------------------------------------------------------------------------------------------------|----------------------------|--------------------------------------------------------------------------------------------------------------------------------------------|
| NCT03645928 | Iovance Biotherapeutics, Inc. | Study of Autologous Tumor Infiltrating Lymphocytes in Patients With Solid Tumors                                           | University of California, San Diego<br>La Jolla, California, United States and 44 more                | II | Cohort 1A, 1B, 1C: Malignant Melanoma<br>Cohort 2A: Squamous Cell Carcinoma of the Head and Neck (HNSCC)<br>Cohort 3A, 3B, 3C: Non-small Cell Lung Cancer (NSCLC)                                       | Yes | Yes, regimen unknown | Cohort 2A + 3A: LN-145 + Pembrolizumab (post tumor resection) for up to 2 years<br>Cohort 3B: LN-145<br>Cohort 3C: LN-145 + Ipilimumab (pre tumor resection) Nivolumab (post tumor resection) for up to 2 years | 178 (total in all cohorts) | Objective response rate<br>Safety profile measured by Grade ≥ 3 treatment-emergent adverse event                                           |
| NCT05087745 | Shanghai Juncell Therapeutics | A Clinical Study on TIL for the Treatment of Advanced Solid Tumors                                                         | Sir Run Run Shaw Hospital, Zhejiang University, School of Medicine, Hangzhou, Zhejiang, China, 310016 | I  | Advanced Solid Tumors                                                                                                                                                                                   | Yes | No                   | Autologous Tumor-Infiltrating Lymphocytes (TIL)                                                                                                                                                                 | 50                         | Adverse events<br>Objective Response Rate<br>Disease Control Rate<br>Duration of Response<br>Progression-Free Survival<br>Overall Survival |
| NCT05430360 | Grit Biotechnology            | Autologous Tumor-infiltrating Lymphocyte Injection (GT201) for the Treatment of Metastatic/Recurrent Advanced Solid Tumors | The First Hospital of Zhejiang University Hangzhou, Zhejiang, China                                   | I  | Metastatic/Recurrent Advanced Solid Tumors                                                                                                                                                              | Yes | Yes, regimen unknown | Autologous Tumor-Infiltrating Lymphocytes (TIL) (GT201)                                                                                                                                                         | 30                         | Safety Profile Measured by Grade ≥3 TEAEs                                                                                                  |
| NCT03935893 | Udai Kammula                  | Adoptive Transfer of Tumor Infiltrating Lymphocytes for Advanced Solid Cancers                                             | UPMC Hillman Cancer Center Pittsburgh, Pennsylvania, United States                                    | II | Gastric Cancer, Colorectal Cancer, Pancreatic Cancer, Sarcoma, Mesothelioma, Neuroendocrine Tumors, Squamous Cell Cancer, Merkel Cell Carcinoma, Mismatch Repair Deficiency, Microsatellite Instability | Yes | HD                   | Autologous Tumor-Infiltrating Lymphocytes (TIL)                                                                                                                                                                 | 10                         | Objective Response Rate                                                                                                                    |
| NCT03991741 | Gregory Daniels               | Adoptive Cell Transfer of Autologous Tumor Infiltrating Lymphocytes and                                                    | UC San Diego Moores Cancer Center La Jolla, California, United States                                 | I  | Metastatic Melanoma<br>Head and Neck Cancer                                                                                                                                                             | Yes | HD                   | Autologous Tumor-Infiltrating Lymphocytes (TIL)                                                                                                                                                                 | 24                         | Dose Limiting Toxicity                                                                                                                     |

|             |                                       |                                                                                                                                                                                                              |                                                                                      |      |                                                                                                                                                             |     |    |                                                                                                                                     |    |                                                                                                                                                                                                                                                                                                                                          |
|-------------|---------------------------------------|--------------------------------------------------------------------------------------------------------------------------------------------------------------------------------------------------------------|--------------------------------------------------------------------------------------|------|-------------------------------------------------------------------------------------------------------------------------------------------------------------|-----|----|-------------------------------------------------------------------------------------------------------------------------------------|----|------------------------------------------------------------------------------------------------------------------------------------------------------------------------------------------------------------------------------------------------------------------------------------------------------------------------------------------|
|             |                                       | High-Dose Interleukin 2 in Select Solid Tumors                                                                                                                                                               |                                                                                      |      |                                                                                                                                                             |     |    |                                                                                                                                     |    |                                                                                                                                                                                                                                                                                                                                          |
| NCT05333588 | Hebei Senlang Biotechnology Inc., Ltd | The Safety Study of Autologous TILs Therapy for Patients With Glioblastoma Multiforme.                                                                                                                       | The Second Hospital of HeBei Medical University Shijiazhuang, Hebei, China           | I    | Glioblastoma Multiforme                                                                                                                                     | Yes | No | Autologous Tumor-Infiltrating Lymphocytes (TIL)                                                                                     | 20 | Number of adverse events related to TILs infusion                                                                                                                                                                                                                                                                                        |
| NCT04426669 | Intima Bioscience, Inc                | A Study of Metastatic Gastrointestinal Cancers Treated With Tumor Infiltrating Lymphocytes in Which the Gene Encoding the Intracellular Immune Checkpoint CISH Is Inhibited Using CRISPR Genetic Engineering | Masonic Cancer Center, University of Minnesota Minneapolis, Minnesota, United States | I/II | Gastrointestinal Epithelial Cancer<br>Colo-rectal Cancer<br>Pancreatic Cancer<br>Gall Bladder Cancer<br>Colon Cancer<br>Esophageal Cancer<br>Stomach Cancer | Yes | HD | Tumor Infiltrating Lymphocytes (TIL) in which the intracellular immune checkpoint CISH has been inhibited using CRISPR gene editing | 20 | Maximum tolerated dose (MTD)<br>Preliminary efficacy of tumor reactive autologous lymphocytes with knockout of CISH gene in patients with refractory metastatic gastrointestinal epithelial cancers: changes in diameter<br>Safety of tumor reactive autologous lymphocytes with knockout of the CISH gene - Incidence of Adverse Events |
| NCT05142475 | Shanghai Juncell Therapeutics         | Study on TIL for the Treatment of Advanced Breast Cancer                                                                                                                                                     | Shanghai Tenth People's Hospital Shanghai, China                                     | I    | Breast Cancer                                                                                                                                               | Yes | No | Autologous Tumor-Infiltrating Lymphocytes (TIL)                                                                                     | 50 | Adverse Events (AE)<br>Objective Response Rate (ORR)<br>Disease Control Rate (DCR)<br>Duration of Response (DOR)<br>Progression-Free Survival (PFS)<br>Overall Survival (OS)                                                                                                                                                             |
| NCT04967833 | Shanghai Juncell Therapeutics         | Study on TIL for the Treatment of Advanced Solid Tumors                                                                                                                                                      | Tongren Hospital Shanghai Jiao Tong University School Of Medicine. Shanghai, China   | I    | Advanced Solid Tumors                                                                                                                                       | Yes | No | Autologous Tumor-Infiltrating Lymphocytes (TIL)                                                                                     | 20 | Adverse Events (AE)<br>Objective Response Rate (ORR)<br>Disease Control Rate (DCR)<br>Duration of Response (DOR)<br>Progression-Free Survival (PFS)                                                                                                                                                                                      |

|             |                                 |                                                                                        |                                                                                 |    |                                                                                                                        |     |                      |                                                                                                                                                                                                                                                                        |     |                                                                                                                                                                              |
|-------------|---------------------------------|----------------------------------------------------------------------------------------|---------------------------------------------------------------------------------|----|------------------------------------------------------------------------------------------------------------------------|-----|----------------------|------------------------------------------------------------------------------------------------------------------------------------------------------------------------------------------------------------------------------------------------------------------------|-----|------------------------------------------------------------------------------------------------------------------------------------------------------------------------------|
|             |                                 |                                                                                        |                                                                                 |    |                                                                                                                        |     |                      |                                                                                                                                                                                                                                                                        |     | Overall Survival (OS)                                                                                                                                                        |
| NCT05098197 | Shanghai Juncell Therapeutics   | Study on TIL for the Treatment of Advanced Hepatobiliary-Pancreatic Cancers            | Shanghai Tenth People's Hospital Shanghai, Shanghai, China                      | I  | Advanced Liver Cancers                                                                                                 | Yes | No                   | Autologous Tumor-Infiltrating Lymphocytes (TIL)                                                                                                                                                                                                                        | 50  | Adverse Events (AE)<br>Objective Response Rate (ORR)<br>Disease Control Rate (DCR)<br>Duration of Response (DOR)<br>Progression-Free Survival (PFS)<br>Overall Survival (OS) |
| NCT05475847 | Fudan University                | Study of C-TIL052A Cell Therapy in Advanced Cervical Cancer                            | Fudan University Shanghai Cancer Center, Shanghai, China                        |    | Cervical Cancer                                                                                                        | Yes | Yes, regimen unknown | Autologous Tumor-Infiltrating Lymphocytes (TIL)                                                                                                                                                                                                                        | 20  | Adverse Events (AE)                                                                                                                                                          |
| NCT04614103 | Iovance Biotherapeutics, Inc.   | Autologous LN-145 in Patients With Metastatic Non-Small-Cell Lung Cancer               | City of Hope Duarte, California, United States and 40 more locations            | II | Non Small Cell Lung Cancer                                                                                             | Yes | Yes, regimen unknown | Autologous Tumor-Infiltrating Lymphocytes (TIL/LN-145)                                                                                                                                                                                                                 | 95  | Objective Response Rate                                                                                                                                                      |
| NCT01174121 | National Cancer Institute (NCI) | Immunotherapy Using Tumor Infiltrating Lymphocytes for Patients With Metastatic Cancer | National Institutes of Health Clinical Center Bethesda, Maryland, United States | II | Colorectal Cancer<br>Pancreatic Cancer<br>Ovarian Cancer<br>Breast Carcinoma<br>Endocrine Tumors/Neuroendocrine Tumors | Yes | HD                   | Experimental 1: Young CD8+ enriched TIL<br>Experimental 2: Young unselected TIL<br>Experimental 3: Young unselected TIL + Pembrolizumab pre (x1) and post (x 3) cell infusion<br>Experimental 4: Young unselected TIL + Pembrolizumab (up to 8 doses) upon progression | 332 | Response rate                                                                                                                                                                |
| NCT04943913 | Shanghai Juncell Therapeutics   | Study on TIL for the Treatment of Brain Glioma                                         | The Second Affiliated Hospital of Soochow University Suzhou, Jiangsu, China     | I  | Glioma                                                                                                                 | Yes | No                   | Autologous Tumor-Infiltrating Lymphocytes (TIL)                                                                                                                                                                                                                        | 50  | Adverse Events (AE)<br>Objective Response Rate (ORR)<br>Disease Control Rate (DCR)<br>Duration of Response (DOR)<br>Progression-Free Survival (PFS)                          |

|             |                                                     |                                                                                                                                                                                                               |                                                            |      |                                                              |                        |                      |                                                                                                    |    |                                                                                                                                                       |
|-------------|-----------------------------------------------------|---------------------------------------------------------------------------------------------------------------------------------------------------------------------------------------------------------------|------------------------------------------------------------|------|--------------------------------------------------------------|------------------------|----------------------|----------------------------------------------------------------------------------------------------|----|-------------------------------------------------------------------------------------------------------------------------------------------------------|
|             |                                                     |                                                                                                                                                                                                               |                                                            |      |                                                              |                        |                      |                                                                                                    |    | Overall Survival (OS)                                                                                                                                 |
| NCT04960072 | Shanghai Juncell Therapeutics                       | Study on TIL for the Treatment of r/r Gastrointestinal Tumors                                                                                                                                                 | Shanghai Tenth People's Hospital Shanghai, China           | I    | Gastrointestinal Tumor                                       | Yes                    | No                   | Autologous Tumor-Infiltrating Lymphocytes (TIL)                                                    | 50 | Objective Response Rate (ORR)<br>Disease Control Rate (DCR)<br>Duration of Response (DOR)<br>Progression-Free Survival (PFS)<br>Overall Survival (OS) |
| NCT04766320 | Shanghai Juncell Therapeutics                       | Study on TIL for the Treatment of r/r Gynecologic Tumors                                                                                                                                                      | Shanghai Tenth People's Hospital Shanghai, Shanghai, China | I    | Gynecologic Cancer                                           | Yes                    | No                   | Autologous Tumor-Infiltrating Lymphocytes (TIL)                                                    | 50 | Objective Response Rate (ORR)<br>Disease Control Rate (DCR)<br>Duration of Response (DOR)<br>Progression-Free Survival (PFS)<br>Overall Survival (OS) |
| NCT05366478 | Suzhou BlueHorse Therapeutics Co., Ltd.             | A Clinical Study of LM103 Injection in the Treatment of Advanced Solid Tumors                                                                                                                                 | Tianjin Beichen Hospital Tianjin, China                    | I    | Melanoma<br>Non Small Cell Lung Cancer<br>Cervical Carcinoma | Yes                    | Yes, regimen unknown | Autologous Tumor-Infiltrating Lymphocytes (TIL)                                                    | 15 | Incidence and severity of adverse events (AEs)                                                                                                        |
| NCT05681780 | H. Lee Moffitt Cancer Center and Research Institute | Clinical Trial of CD40L-Augmented TIL for Patients With EGFR, ALK, ROS1 or HER2-Driven NSCLC                                                                                                                  | Moffitt Cancer Center Tampa, Florida, United States        | I/II | Non Small Cell Lung Cancer                                   | Yes                    | HD                   | Tumor-Infiltrating Lymphocytes (TIL)<br>Nivolumab (pre and post cell infusion for up to 12 months) | 20 | Adverse Events (AE)                                                                                                                                   |
| NCT04383067 | Sheba Medical Center                                | Phase 2, Single-Center, Open Label Study of Autologous, Adoptive Cell Therapy Following a Reduced Intensity, Non-myeloablative, Lymphodepleting Induction Regimen in Metastatic Urothelial Carcinoma Patients | Sheba Medical Center, Israel                               | II   | Urothelial Carcinoma                                         | Yes, reduced intensity | HD                   | Autologous Tumor-Infiltrating Lymphocytes (TIL)                                                    | 20 | Efficacy<br>Safety                                                                                                                                    |
| NCT05417750 | Shanghai Juncell Therapeutics                       | A Phase I Study on Autologous Tumor                                                                                                                                                                           | Chinese PLA General Hospital                               | I    | Cohort 1: Advanced solid tumors                              | Yes                    |                      | Autologous Tumor-Infiltrating                                                                      | 60 | Maximal Tolerance Dose<br>Dose Limiting Toxicity                                                                                                      |

|             |                                          |                                                                                                                                                                                                            |                                                                                                                     |    |                                                                                                                                                          |     |    |                                                                                                                                                                                                 |     |                                                                                                                                                                                                                     |
|-------------|------------------------------------------|------------------------------------------------------------------------------------------------------------------------------------------------------------------------------------------------------------|---------------------------------------------------------------------------------------------------------------------|----|----------------------------------------------------------------------------------------------------------------------------------------------------------|-----|----|-------------------------------------------------------------------------------------------------------------------------------------------------------------------------------------------------|-----|---------------------------------------------------------------------------------------------------------------------------------------------------------------------------------------------------------------------|
|             |                                          | Infiltrating Lymphocytes Injection (GC101 TIL) for the Treatment of Advanced Malignant Solid Tumors                                                                                                        | Beijing, Beijing, China                                                                                             |    | Cohort 2: cervix tumors<br>Cohort 3: malignant melanoma<br>Cohort 4: HNSCC                                                                               |     |    | Lymphocytes (TIL/ GC101 TIL) + Sintilimab                                                                                                                                                       |     | Adverse Events                                                                                                                                                                                                      |
| NCT05573035 | Lyell Immunopharma, Inc.                 | A Study to Investigate LYL845 in Adults With Solid Tumors                                                                                                                                                  | Ohio State University Medical Center<br>Columbus, Ohio, United States and 3 other locations                         | I  | Melanoma<br>Non-small Cell Lung Cancer<br>Colorectal Cancer                                                                                              | No  | No | LYL845: autologous tumor infiltrating lymphocyte (TIL) enhanced via Epi-R, a proprietary epigenetic reprogramming technology                                                                    | 108 | Incidence of dose-limiting toxicities (DLTs)<br>Incidence of treatment-emergent adverse events (TEAEs)<br>Severity of treatment-emergent adverse events (TEAEs)<br>Determine recommended Phase 2 Dose Range (RP2DR) |
| NCT03449108 | M.D. Anderson Cancer Center              | LN-145 or LN-145-S1 in Treating Patients With Relapsed or Refractory Ovarian Cancer, Triple Negative Breast Cancer (TNBC), Anaplastic Thyroid Cancer, Osteosarcoma, or Other Bone and Soft Tissue Sarcomas | M D Anderson Cancer Center<br>Houston, Texas, United States                                                         | II | Cohort 1: Ovarian Cancer, Triple Negative Breast Cancer (TNBC), Osteosarcoma, Other Bone and Soft Tissue Sarcomas<br>Cohort 2: Anaplastic Thyroid Cancer | Yes | HD | Cohort 1: Autologous tumor infiltrating lymphocyte (TIL), Nivolumab + Ipilimumab (x1) pre surgery, Nivolumab (x4) post TIL infusion<br>Cohort 2: Autologous tumor infiltrating lymphocyte (TIL) | 95  | Objective response rate                                                                                                                                                                                             |
| NCT05430373 | Grit Biotechnology                       | GT101 Injection for the Treatment of Metastatic or Recurrent Solid Tumors                                                                                                                                  | The fifth medical center of the General Hospital of the Chinese people's Liberation Army<br>Beijing, Beijing, China | I  | Solid tumors                                                                                                                                             | Yes | HD | Autologous tumor-infiltrating lymphocytes (TIL/ GT101)                                                                                                                                          | 31  | Safety Profile Measured by Grade ≥3 TEAEs<br>Objective response rate<br>Progression-free survival<br>Overall survival                                                                                               |
| NCT04643574 | Centre Hospitalier Universitaire Vaudois | NeoTIL in Advanced Solid Tumors                                                                                                                                                                            | Centre hospitalier universitaire vaudois (CHUV)                                                                     | I  | Solid tumors                                                                                                                                             | Yes | HD | Autologous Tumor-Infiltrating Lymphocytes Enriched                                                                                                                                              | 42  | Evaluation of the number of patients who successfully receive NeoTIL-ACT in                                                                                                                                         |

|             |                                  |                                                                                                                     |                                                                                                                                   |      |                                                                                 |     |                      |                                                                                                                                                                                                                                            |     |                                                                                                                                                                                                    |
|-------------|----------------------------------|---------------------------------------------------------------------------------------------------------------------|-----------------------------------------------------------------------------------------------------------------------------------|------|---------------------------------------------------------------------------------|-----|----------------------|--------------------------------------------------------------------------------------------------------------------------------------------------------------------------------------------------------------------------------------------|-----|----------------------------------------------------------------------------------------------------------------------------------------------------------------------------------------------------|
|             |                                  |                                                                                                                     | Lausanne, Vaud, Switzerland                                                                                                       |      |                                                                                 |     |                      | d for Tumor Antigen Specificity (NeoTIL) Low dose-irradiation (LDI) administered once to tumor lesions before infusion of NeoTIL                                                                                                           |     | combination with LDI (feasibility) Toxicity of NeoTIL-ACT in combination with LDI Objective response rate                                                                                          |
| NCT04072263 | Leiden University Medical Center | Adoptive T Cell Therapy in Patients With Recurrent Ovarian Cancer                                                   | Leiden University Medical Center, Netherlands                                                                                     | I/II | Epithelial Ovarian Cancer                                                       | No  | No                   | Cohort 1: Carboplatin-paclitaxel day1, q3 weeks, 6x TIL starting 14 days after the 2nd chemotherapy cycle<br>Cohort 2: Above regimen + IFN $\alpha$ (3x10e6 U daily) starting one week before the first TIL infusion for 12 weeks in total | 12  | NCI CTC criteria                                                                                                                                                                                   |
| NCT03108495 | Iovance Biotherapeutics, Inc     | Study of LN-145, Autologous Tumor Infiltrating Lymphocytes in the Treatment of Patients With Cervical Carcinoma     | St. Joseph's Hospital and Medical Center Center For Women's Health, Phoenix, Arizona, United States, 85013 and 39 other locations | II   | Cervical carcinoma                                                              | Yes | Yes, regimen unknown | Cohort 1 + 2: LN-145<br>Cohort 2: LN<br>Cohort 3: LN-145 + Pembrolizumab (up to 24 months)<br>Cohort 4: LN-145<br>Cohort 5: LN-145                                                                                                         | 189 | Cohort 1 and 2: Objective Response Rate<br>Cohort 3: Adverse Events<br>Cohort 4: Efficacy and Adverse Events<br>Cohort 5: Efficacy and Adverse Events                                              |
| NCT04611126 | Inge Marie Svane                 | T-cell therapy in Combination With Nivolumab, Relatlimab and Ipilimumab for Patients With Metastatic Ovarian Cancer | National Center for Cancer Immune Therapy, Herlev, Denmark                                                                        | I/II | Epithelial ovarian cancer                                                       | Yes | No                   | Step 1: TIL + Nivolumab (x4) +Relatlimab (x 4)<br>Step 2: Ipilimumab (x1) + TIL + Nivolumab (x4) + Relatlimab (x4)                                                                                                                         | 18  | Number of patients excluded due to treatment related safety issues<br>Fraction of patients experiencing grade III or worse adverse events<br>Number of patients excluded due to feasibility issues |
| NCT05397093 | Instil Bio                       | ITIL-306 in Advanced Solid Tumors                                                                                   | Washington University School of Medicine Saint Louis,                                                                             | I    | Epithelial Ovarian Cancer<br>Non-small Cell Lung Cancer<br>Renal Cell Carcinoma | Yes | No                   | Tumor-infiltrating lymphocytes containing a unique molecule designed to increase TIL activity                                                                                                                                              | 51  | Frequency and severity of ITIL-306 treatment-emergent adverse events (AEs), serious AEs, and AEs of special interest (AESI)                                                                        |

|             |                                            |                                                                                                                                                                                        |                                                                                                                                                                                     |      |                   |     |    |                                                                                                                                |                           |                                                                       |
|-------------|--------------------------------------------|----------------------------------------------------------------------------------------------------------------------------------------------------------------------------------------|-------------------------------------------------------------------------------------------------------------------------------------------------------------------------------------|------|-------------------|-----|----|--------------------------------------------------------------------------------------------------------------------------------|---------------------------|-----------------------------------------------------------------------|
|             |                                            |                                                                                                                                                                                        | Missouri, United States<br>Memorial Sloan Kettering Cancer Center<br>New York, New York, United States                                                                              |      |                   |     |    | when it encounters folate receptor $\alpha$ (FOLR1) on the tumor (ITIL-306)<br>Phase 1a: Dose Escalation<br>Phase 2: Expansion |                           |                                                                       |
| NCT04674488 | Shanghai OriginCell Therapeutics Co., Ltd. | TILs for Treatment of Metastatic or Recurrent Cervical Cancer                                                                                                                          | Shanghai general hospital<br>Shanghai, Shanghai, China                                                                                                                              | I    | Cervical Cancer   | Yes | HD | Autologous Tumor-Infiltrating Lymphocytes (TIL)                                                                                | 15                        | dose limited toxicity, DLT                                            |
| NCT05361174 | Iovance Biotherapeutics, Inc.              | A Study to Investigate the Efficacy and Safety of an Infusion of IOV-4001 in Adult Participants With Unresectable or Metastatic Melanoma or Stage III or IV Non-small-cell Lung Cancer | University of Louisville<br>Louisville, Kentucky, United States<br>Memorial Sloan Kettering Cancer Center, New York, United States<br>University of Cincinnati, Ohio, United States | I/II | Melanoma<br>NSCLC | Yes | HD | PD-1 Knockout Tumor-infiltrating Lymphocytes (IOV-4001)                                                                        | 53 (total in all cohorts) | Phase I: Safety of IOV-4001<br>Phase 2: Objective Response Rate (ORR) |

Table S1. Recruiting TIL trials for patients with non-melanoma solid cancers (assessed, January 23, 2023). Trial information is assessed from Clinicaltrials.gov using search setting: "Recruiting", "Interventional (clinical trial)", "Adults", "Tumor infiltrating Lymphocytes". HD: High Dose.
